# Supplementary material for: Phosphorylation of luminal region of the SUN-domain protein Mps3 promotes nuclear envelope localization during meiosis
Source: eLife. 2021 Sep 29;10:e63119. doi: 10.7554/eLife.63119 (PMC8570693; doi:10.7554/eLife.63119)
Supplement: Figure 1—source data 1. [file elife-63119-fig1-data1.xlsx]

## Sheet: Fig. 1B
WT Mps3-GFP
Time (h)	Class I	Class II	Class III	Class IV
0	100	0	0	0
1	94	6	0	0
2	45	55	0	0
3	8	24	68	0
4	0	13	64	23
5	0	2	38	60
6	0	0	24	76
cdc28as1 without inhibitor						cdc28as1 with inhibitor
Time (h)	Class I	Class II	Class III	Class IV		Time (h)	Class I	Class II	Class III	Class IV
0	100	0	0	0		0	100	0	0	0
1	93	7	0	0		1	81	19	0	0
2	51	49	0	0		2	41	40	19	0
3	12	28	60	0		3	40	45	8	7
4	0	21	59	20		4	32	46	10	12
5	0	10	44	46		5	24	51	11	14
6	0	6	24	70		6	11	55	14	20
cdc7as3 without inhibitor						cdc7as3 with inhibitor
Time (h)	Class I	Class II	Class III	Class IV		Time (h)	Class I	Class II	Class III	Class IV
0	100	0	0	0		0	100	0	0	0
1	94	6	0	0		1	100	0	0	0
2	56	44	0	0		2	61	39	0	0
3	32	51	17	0		3	62	38	0	0
4	30	20	50	0		4	32	67	1	0
5	18	12	48	22		5	12	60	28	0
6	14	10	28	32		6	9	65	26	0
cdc7d bob1-1
Time (h)	Class I	Class II	Class III	Class IV
0	100	0	0	0
1	100	0	0	0
2	100	39	0	0
3	82	18	0	0
4	79	16	5	0
5	76	13	4	7
6	74	13	5	8

## Sheet: Fig. 1G
	Average %					SD
	Class I	Class II	Class III	Class IV		Class I	Class II	Class III	Class IV
WT	0	0	24	76		0	0	3	3
cdc28as1 without inhibitor	0	6	24	70		0	2	3	4
cdc28as1 with inhibitor	11	55	14	20		3	3	2	2
cdc7as3without inhibitor	0	3	12	85		0	1	2	3
cdc7as3 with inhibitor	9	65	26	0		2	4	3	0
cdc7 bob1-1	74	14	5	8		4	2	1	1

## Sheet: Fig.1H left
average speed
wild type	cdc28as1 -inhibitor	cdc28as1 + inhibitor	cdc7as3 -inhibitor	cdc7as3 + inhibitor	cdc7d bob1-1
0.07875	0.14	0.123125	0.11125	0.0575	0.02125
0.07625	0.09125	0.099375	0.099375	0.125625	0.0225
0.135	0.13375	0.105625	0.17	0.064375	0.049375
0.149375	0.071875	0.195625	0.1025	0.0825	0.023125
0.125625	0.106875	0.115	0.065	0.0425	0.02875
0.13875	0.133125	0.1225	0.125	0.088125	0
0.145625	0.135	0.105625	0.10375	0.09	0.024375
0.181875	0.12875	0.105	0.241875	0.0575	0.053125
0.105625	0.096875	0.1075	0.09375	0.07625	0.05125
0.1775	0.06375	0.073125	0.139375	0.065625	0.033125
0.148125	0.0825	0.074375	0.1425	0.050625	0
0.155	0.089375	0.09625	0.205625	0.024375	0.038125
0.07625	0.13625	0.150625	0.151875	0.06	0.025625
0.175625	0.113125	0.075	0.1525	0.049375	0.035
0.13625	0.09125	0.1125	0.099375	0.048125	0.029375
0.155	0.075	0.07125	0.241875	0.045625	0.043125
0.1075	0.1125	0.101875	0.071875	0.083125	0.024375
0.09375	0.07125	0.05875	0.150625	0.02	0.03625
0.195625	0.17875	0.053125	0.116875	0.091875	0.07125
0.08375	0.074375	0.06375	0.04125	0.068125	0.0325
0.2125	0.11125	0.081875	0.08375		0.026875
0.123125	0.1175		0.0225		0.036875
0.194375	0.143125		0.1725		0.0325
0.164375	0.1175		0.1475		0.02125
0.081875	0.116875		0.12125		0.0225
0.12125	0.14125		0.181875		0.049375
0.079375	0.159375		0.18125		0.023125
0.153125	0.15125		0.170625		0.02875
0.18125	0.12		0.111875
0.085	0.131875		0.148125
0.1875	0.089375		0.195
0.17375	0.11625		0.15125
0.14	0.133125		0.191875
0.198125	0.1225		0.09375
0.20875	0.111875		0.139375
0.1525	0.19875		0.1425
0.13125	0.1		0.205625
0.2175	0.09125		0.151875
0.109375	0.11125		0.1525
0.180625	0.16		0.099375
0.123125	0.134375		0.241875
0.143125	0.09		0.071875
0.25625	0.145625		0.150625
0.098125	0.11625		0.116875
0.085	0.0775		0.04125
0.101875	0.101875		0.08375
	0.09
	0.070625
	0.135625
	0.16375
	0.136875
	0.1075
	0.134375
	0.1025
	0.071875
	0.115625
	0.130625
	0.125625
	0.1475
	0.195
	0.1425
	0.24
	0.131875

## Sheet: Fig.1H-right
maximum speed
wild type	cdc28as1 -inhibitor	cdc28as1 + inhibitor	cdc7as3 -inhibitor	cdc7as3 + inhibitor	cdc7d bob1-1
0.093125	0.26625	0.31125	0.296875	0.22	0.039375
0.114375	0.218125	0.155	0.236875	0.255	0.045
0.28875	0.205	0.27375	0.435625	0.13375	0.08
0.265	0.115	0.3925	0.1925	0.28125	0.0425
0.26125	0.233125	0.24	0.118125	0.0625	0.02875
0.290625	0.28125	0.18875	0.498125	0.2325	0
0.31	0.206875	0.21875	0.203125	0.13	0.040625
0.28375	0.21125	0.24875	0.5075	0.100625	0.175625
0.18	0.20375	0.239375	0.15375	0.140625	0.066875
0.339375	0.168125	0.08	0.34625	0.1675	0.0825
0.385625	0.16125	0.155	0.26375	0.10375	0
0.261875	0.215	0.23375	0.354375	0.03875	0.070625
0.125625	0.24875	0.514375	0.315625	0.099375	0.04875
0.233125	0.281875	0.1225	0.37125	0.170625	0.0825
0.351875	0.1975	0.228125	0.111875	0.075625	0.0575
0.305625	0.14875	0.104375	0.47625	0.0975	0.096875
0.145	0.22875	0.156875	0.173125	0.134375	0.0475
0.30375	0.0725	0.085625	0.249375	0.028125	0.073125
0.263125	0.345625	0.13125	0.193125	0.193125	0.11375
0.16	0.124375	0.135	0.201875	0.1475	0.074375
0.3125	0.225	0.09875	0.08375		0.09375
0.31875	0.23		0.034375		0.08125
0.268125	0.195		0.513125		0.073125
0.350625	0.215		0.264375		0.039375
0.1125	0.22625		0.353125		0.045
0.235625	0.258125		0.310625		0.08
0.219375	0.27125		0.370625		0.0425
0.2425	0.380625		0.218125		0.02875
0.321875	0.273125		0.185
0.11125	0.290625		0.210625
0.25375	0.15875		0.246875
0.258125	0.231875		0.17375
0.255	0.24625		0.225625
0.2925	0.23125
0.274375	0.275625
0.276875	0.30875
0.145	0.213125
0.3075	0.150625
0.208125	0.11125
0.39375	0.2325
0.145625	0.203125
0.33	0.136875
0.3175	0.20375
0.43	0.2075
0.198125	0.169375
0.1425	0.19875
	0.185625
	0.1325
	0.20125
	0.266875
	0.273125
	0.2025
	0.42125
	0.279375
	0.110625
	0.17375
	0.200625
	0.184375
	0.326875
	0.3325
	0.3375
	0.276875
	0.21125
