# Supplementary material for: Phosphorylation of luminal region of the SUN-domain protein Mps3 promotes nuclear envelope localization during meiosis
Source: eLife. 2021 Sep 29;10:e63119. doi: 10.7554/eLife.63119 (PMC8570693; doi:10.7554/eLife.63119)
Supplement: Figure 2—source data 1. [file elife-63119-fig2-data1.xlsx]

## Sheet: Fig.2C-left
average speed
wild type (0 h)	wild type (4 h)	cdc28as1 + inhibitor	cdc7as3 + inhibitor	cdc7d bob1-1
0.116303	0.144376	0.0695394	0.0802706	0.153164
0.0729131	0.181706	0.130133	0.149894	0.0207942
0.0395582	0.143902	0.0836525	0.0942781	0.113602
0.0511477	0.151367	0.0841119	0.112001	0.124764
0.103936	0.129747	0.168332	0.160786	0.186535
0.101218	0.146548	0.112242	0.154078	0.100851
0.0529404	0.146921	0.116278	0.0914175	0.112151
0.0531052	0.0857225	0.161685	0.122638	0.050551
0.0260569	0.135488	0.190136	0.193109	0.0157762
0.078175	0.113904	0.114309	0.0683162	0.127034
0.0231851	0.0778588	0.100449	0.0494979	0.173336
0.0715331	0.143467	0.145336	0.0500227	0.108319
0.0631287	0.0901119	0.0939575	0.0621474	0.0869631
0.113436	0.204945	0.112654	0.0964388	0.0820644
0.0490154	0.0801987	0.0835569	0.103333	0.173979
0.0787956	0.109356	0.0714638	0.114261	0.0571751
0.0841169	0.125672	0.0726319	0.122667	0.0489957
0.0906375	0.0916381	0.170297	0.109623	0.0751806
0.0617163	0.113499			0.116375
0.0484858	0.0815194			0.0733981
0.0652869	0.0911337			0.049868
0.0788669	0.135745
0.0313016	0.0763594
0.126788	0.148845
0.0688356	0.0416637
0.0357716	0.106801
0.0468072	0.0676487
	0.136031
	0.0923606
	0.0534209
	0.129692
	0.148183
	0.153903
	0.0400008
	0.0891431
	0.217034
	0.0620468
	0.0973612
	0.131841
	0.122556
	0.126985

## Sheet: Fig.2C-right
maximum speed
wild type (0 h)	wild type (4 h)	cdc28as1 + inhibitor	cdc7as3 + inhibitor	cdc7d bob1-1
0.183732	0.304942	0.16864	0.177983	0.321516
0.205198	0.3358	0.247863	0.378887	0.0334496
0.0831444	0.292726	0.149431	0.146537	0.310284
0.0910787	0.228179	0.108757	0.226759	0.282669
0.161869	0.181294	0.229008	0.336998	0.257003
0.180438	0.193147	0.250149	0.337432	0.265022
0.0656287	0.319739	0.340574	0.371634	0.253897
0.160254	0.159062	0.307808	0.165846	0.0618217
0.0335996	0.443194	0.353428	0.247717	0.0272505
0.119408	0.137943	0.373387	0.227892	0.262811
0.0257696	0.146238	0.185924	0.109806	0.469594
0.117969	0.255003	0.353815	0.160941	0.321033
0.125047	0.118303	0.322363	0.129826	0.237825
0.182564	0.366208	0.145579	0.226698	0.140582
0.0856612	0.206421	0.130691	0.186068	0.253291
0.111408	0.202095	0.181099	0.244322	0.408046
0.220244	0.307613	0.101816	0.14963	0.116291
0.173398	0.110176	0.226904	0.238397	0.114873
0.194029	0.279216			0.222654
0.0848275	0.140737			0.168688
0.131528	0.108174			0.0839506
0.314687	0.375341			0.0635538
0.0956456	0.287093
0.257786	0.385332
0.13125	0.0967262
0.0710506	0.390747
0.0665031	0.134651
	0.248185
	0.255682
	0.130128
	0.213524
	0.353543
	0.215871
	0.0474436
	0.166848
	0.236747
	0.120931
	0.0973612
	0.305317
	0.307989
	0.153727

## Sheet: Fig.2D
Time (h)	wild type	cdc28as1 -inhibitor	cdc28as1 + inhibitor	cdc7as3 -inhibitor	cdc7as3 + inhibitor	cdc7d bob1-1
0	0	0	0	0	0	0
1	0	0	0	0	0	0
2	0	7	0	0	0	0
3	34	21	29	34	34	3
4	37	31	37	45	37	48
5	6	6	56	85	6	73
6	0	0	68	90	0	81
