# Supplementary material for: Phosphorylation of luminal region of the SUN-domain protein Mps3 promotes nuclear envelope localization during meiosis
Source: eLife. 2021 Sep 29;10:e63119. doi: 10.7554/eLife.63119 (PMC8570693; doi:10.7554/eLife.63119)
Supplement: Figure 3—source data 1. [file elife-63119-fig3-data1.xlsx]

## Sheet: Fig.3F
Substrates	Kinase	AU
GST-Mps3	DDK	198
GST-Mps3	CDK	1037
GST-Mps3	CDK+DDK	3144
GST-Mps3-AAA	CDK+DDK	125

## Sheet: Fig.3K
Time (h)	wild type	MPS3-MER2
0	0	0
1	0	0
2	0	0
3	34	29
4	37	22
5	6	0
6	0	0
