# Supplementary material for: Phosphorylation of luminal region of the SUN-domain protein Mps3 promotes nuclear envelope localization during meiosis
Source: eLife. 2021 Sep 29;10:e63119. doi: 10.7554/eLife.63119 (PMC8570693; doi:10.7554/eLife.63119)
Supplement: Figure 4—source data 1. [file elife-63119-fig4-data1.xlsx]

## Sheet: Fig.4A
% of cells
	wild type	ndj1	mps3-AAA	mps3-AAA ndj1
time (h)
0	0	0	0	0
2	0	1	0	0
4	6	0	0	0
6	46	0	12	0
6	74	19	56	17
10	97	53	80	52

## Sheet: Fig.4D
Rap-1GFP
WT	mps3-AAA
0.111778	0.08233
0.119253	0.0622243
0.0878156	0.0496866
0.117195	0.0657175
0.135403	0.06466
0.105476	0.0940187
0.0483494	0.109029
0.0733788	0.0712963
0.177317	0.0497493
0.0423947	0.0737631
0.0759425	0.0295746
0.246756	0.0913806
0.110562	0.128758
0.0542753	0.120714
0.160161	0.0527389
0.108893	0.0879744
0.0949162	0.141109
0.079035	0.0594284
0.09167	0.0916638
0.129834	0.0702162
0.0697394	0.0718687
0.100619	0.0415126
0.0896756	0.127192
0.139164	0.0755875
0.116856	0.0883619
0.0777675	0.107512
0.205533	0.0464457
0.0983088	0.07529
0.10456	0.0911244
0.221225	0.113311
0.142757	0.093505
0.10145	0.0635088
0.103072	0.065395
	0.0954925
	0.06589
	0.108501

## Sheet: Fig.4F
Zip1-GFP
Range	Wild type	mps3-AAA
0.1	0	0
0.2	0	11
0.3	0	16
0.4	0	6
0.5	0	2
0.6	3	0
0.7	3	0
0.8	5	0
0.9	6	0
1	13	0
1.1	0	0
1.2	3	0
1.3	0	0
>1.4	3	0

## Sheet: Fig.4H
% of cells
Wild type
Time (h)	Class I	Class II	Class III	Class IV
0	100	0	0	0
1	94	6	0	0
2	47	50	3	0
3	7	26	67	0
4	1	12	66	21
5	0	2	38	60
6	0	0	24	76
mps3-AAA
Time (h)	Class I	Class II	Class III	Class IV
0	100	0	0	0
1	100	0	0	0
2	91	9	0	0
3	89	11	0	0
4	67	20	13	0
5	55	33	12	0
6	40	34	21	5

## Sheet: Fig.4I
	Average %					SD
	Class I	Class II	Class III	Class IV		Class I	Class II	Class III	Class IV
Wild type	1	9.5	34.7	59.7		1.7	6.4	9.5	16.5
mps3-AAA	41.7	34.7	21	2.7		12.6	2.1	9	2.5

## Sheet: Fig.4L
mean speed			maximum speed
wild type	mps3-AAA		wild type	mps3-AAA
0.16625	0.051875		0.329375	0.0975
0.1225	0.06		0.21125	0.131875
0.1125	0.051875		0.1475	0.11
0.13	0.028125		0.224375	0.043125
0.09875	0.05375		0.1825	0.095625
0.148125	0.0425		0.36875	0.0625
0.121875	0.05625		0.24375	0.076875
0.21	0.05375		0.3925	0.090625
0.164375	0.03		0.43125	0.050625
0.14	0.05		0.2325	0.066875
0.20875	0.03375		0.330625	0.07375
0.1475	0		0.26875	0
0.166875	0.03875		0.468125	0.069375
0.248125	0.011875		0.344375	0.011875
0.17875	0.026875		0.205625	0.043125
0.20875	0.07125		0.39375	0.09625
0.113125			0.120625
0			0
0.12625			0.4175
0.115625			0.183125
0.158125			0.335
0.10875			0.18125
0.194375			0.395625
0.216875			0.4375
0.155			0.3725
0.153125			0.346875
0.18125			0.254375
0.24			0.4925
0.199375			0.323125
0.15625			0.356875
0.095			0.170625

## Sheet: Fig.4M
Wild-type (0h)	Wild-type (4h)	WT+LatB	mps3-AAA(0h)	mps3-AAA(4h)
0.345689	1.35963	1.62521	0.001607	0.001607
0.4829	2.03856	1.62521	0.001607	0.003214
0.58326	2.9356	1.93791	0.001607	0.515914
0.647731	3.39856	2.60856	0.001607	0.607525
0.64922	3.71132	2.60856	0.003214	0.655741
0.73829	3.8639	2.86777	0.003214	0.660562
0.73829	3.93533	2.86777	0.004822	0.666991
0.743904	3.9457	2.95829	0.506271	0.716815
0.768392	3.9682	2.95829	0.528771	0.748959
0.832155	4.20386	3.63306	0.540022	0.750566
0.832155	4.23954	3.71535	0.548058	0.769853
0.837501	4.28538	3.71535	0.549665	0.774674
0.84392	4.2967	3.76472	0.557701	0.80039
0.87329	4.32957	3.76472	0.602703	0.806818
0.923457	4.3407	3.84701	0.638062	0.84057
0.923457	4.39692	3.84701	0.647705	0.846999
0.92347	4.7932	4.16383	0.675027	0.85182
0.93267	4.8293	4.16383	0.699135	0.858249
0.93278	4.92077	4.20497	0.700743	0.883964
0.9357	4.92387	4.20497	0.703957	0.90968
0.935729	4.92537	4.43949	0.703957	0.92093
0.94357	4.96783	4.43949	0.7136	0.925752
0.945386	4.96872	4.47652	0.726458	0.932181
0.96382	4.97044	4.47652	0.736101	0.935395
0.973259	5.0239	4.51767	0.744137	0.940217
0.984373	5.0239	4.55058	0.747352	0.946645
0.98473	5.03958	4.72339	0.747352	0.953074
1.03285	5.09674	4.74808	0.781103	0.962718
1.0358	5.09749	4.74808	0.798782	0.965932
1.0358	5.23956	4.90854	0.798782	0.980397
1.04583	5.23956	4.92911	0.805211	0.982004
1.04854	5.23968	5.00317	0.819676	0.982004
1.06392	5.28936	5.00317	0.821283	0.985218
1.09539	5.29379	5.01552	0.826105	0.994862
1.22639	5.32796	5.01552	0.827712	1.00772
1.2385	5.32943	5.06489	0.830927	1.02379
1.24386	5.32954	5.10604	0.830927	1.02701
1.27539	5.32963	5.10604	0.834141	1.03665
1.32707	5.32968	5.1801	0.835748	1.0479
1.32849	5.78923	5.21713	0.838963	1.05272
1.32956	5.8357	5.21713	0.84057	1.07361
1.35856	5.89237	5.36525	0.845391	1.07844
1.3845	5.93263	5.36525	0.846999	1.08808
1.38539	5.93283	5.42285	0.848606	1.08808
1.3855	5.98235	5.42285	0.850213	1.09129
1.38571	5.98247	5.44342	0.85182	1.11058
1.38573	5.98357	5.44342	0.855035	1.11058
1.3859	6.03299	5.48457	0.8695	1.11219
1.3863	6.03896	5.48457	0.877536	1.11701
1.38976	6.07633	5.50514	0.879143	1.1379
1.39357	6.09378	5.50514	0.883964	1.14112
1.39504	6.23396	5.63269	0.888786	1.15558
1.39753	6.23956	5.64091	0.893608	1.1588
1.45782	6.23958	5.64091	0.896822	1.16362
1.4592	6.23958	5.78081	0.92093	1.17487
1.4863	6.2396	5.78081	0.935395	1.18451
1.59467	6.32986	5.79726	0.962718	1.19255
1.6327	6.34529	5.81784	0.965932	1.23916
1.65893	6.38052	5.81784	0.969146	1.24076
1.7392	6.39632	5.86721	0.972361	1.26166
1.82436	6.39692	6.16756	0.985218	1.26166
1.83404	6.83259	6.18402	0.986826	1.33077
1.8355	6.83275	6.18402	0.999683	1.34041
1.8357	6.83293	6.18814	1.00933	1.35166
1.8395	6.83293	6.42266	1.01093	1.3597
1.83957	6.83295	6.44323	1.01736	1.36613
1.8457	6.84329	6.44323	1.01897	1.36934
1.84943	6.92538	6.4638	1.02218	1.36934
1.8496	6.93285	6.4638	1.05272	1.38381
1.84963	6.9382	6.55844	1.06236	1.38541
1.84964	7.02398	6.55844	1.09933	1.39184
1.85946	7.0329	6.58312	1.1154	1.39345
1.85967	7.03863	6.58312	1.1154	1.39345
1.93763	7.20357	6.65719	1.12826	1.40952
1.9385	7.2395	6.65719	1.13308	1.43041
1.9385	7.2835	6.78473	1.14594	1.44488
1.93856	7.29358	6.78473	1.1604	1.45292
1.98358	7.32932	6.96577	1.17808	1.45934
2.04856	7.32953	6.96577	1.17808	1.49952
2.0496	7.32965	6.99457	1.17808	1.50595
2.09475	7.32967	6.99457	1.17808	1.53649
2.11356	7.32983	7.0316	1.1813	1.54613
2.21079	7.3935	7.22086	1.18612	1.55417
2.34593	7.81729	7.22086	1.18933	1.55739
2.45834	7.90832	7.3155	1.2038	1.6281
2.45842	7.9272	7.3155	1.21987	1.64899
2.45984	7.93285	7.52122	1.2263	1.66667
2.47835	7.98356	7.69403	1.26487	1.66828
2.48946	8.0376	7.69403	1.28416	1.68275
2.49375	8.23905	7.83392	1.38863	1.71168
2.73956	8.23954	7.89975	1.39827	1.71971
2.74382	8.32053	8.70618	1.40952	1.7615
2.84757	8.3492	8.87487	1.49952	2.14402
2.84967	8.9355	8.87487	1.61203	2.45742
