# Supplementary material for: Phosphorylation of luminal region of the SUN-domain protein Mps3 promotes nuclear envelope localization during meiosis
Source: eLife. 2021 Sep 29;10:e63119. doi: 10.7554/eLife.63119 (PMC8570693; doi:10.7554/eLife.63119)
Supplement: Figure 5—source data 1. [file elife-63119-fig5-data1.xlsx]

## Sheet: Fig.5B
Time (h)	wild type	MPS3-DDD	cdc28as1 (+)MPS3-DDD	cdc7as3 (+)MPS3-DDD
0	0	0	0	0
1	0	0	0	0
2	0	0	0	0
3	34	29	26	36
4	37	20	31	34
5	6	6	39	36
6	0	0	28	38

## Sheet: Fig.5D
WT Mps3-GFP						cdc28as1						cdc7-as3
Time (h)	Class I	Class II	Class III	Class IV		Time (h)	Class I	Class II	Class III	Class IV		Time (h)	Class I	Class II	Class III	Class IV
0	100	0	0	0		0	100	0	0	0		0	100	0	0	0
1	94	6	0	0		1	81	19	0	0		1	100	0	0	0
2	45	55	0	0		2	41	40	19	0		2	61	39	0	0
3	8	24	68	0		3	40	45	8	7		3	62	38	0	0
4	0	13	64	23		4	32	46	10	12		4	32	67	1	0
5	0	2	38	60		5	24	51	11	14		5	12	60	28	0
6	0	0	24	76		6	11	55	14	20		6	9	65	26	0
MPS3-DDD						cdc28-as1 MPS3-DDD						cdc7-as3 MPS3-DDD
Time (h)	Class I	Class II	Class III	Class IV		Time (h)	Class I	Class II	Class III	Class IV		Time (h)	Class I	Class II	Class III	Class IV
0	100	0	0	0		0	91	8	0	0		0	98	2	0	0
1	92	8	0	0		1	83	17	0	0		1	92	3	7	0
2	71	29	0	0		2	42	44	14	0		2	18	45	25	12
3	23	48	18	11		3	21	16	37	26		3	12	23	40	25
4	7	12	64	17		4	12	9	36	43		4	8	16	46	30
5	3	9	32	56		5	8	6	23	63		5	6	9	32	64
6	18	2	13	67		6	1	4	18	77		6	0	3	12	85

## Sheet: Fig.5F-left
mean velocity
Wild type	MPS3-DDD	cdc28-as1	cdc28-as1 MPS3-DDD	cdc7-as3	cdc7-as3 MPS3-DDD	cdc7 bob1-1	cdc7 bob1-1 MPS3-DDD
0.126875	0.102134	0.123125	0.2025	0.0705594	0.134755	0	0.0712562
0.20125	0.125691	0.099375	0.128125	0.151714	0.151503	0.0560778	0.0579336
0.079375	0.230055	0.105625	0.146875	0.115244	0.112461	0.0733025	0.0661306
0.170625	0.195664	0.195625	0.121875	0.0801681	0.127001	0.0830975	0.0769925
0.115625	0.109014	0.115	0.025625	0.139191	0.115617	0.0563323	0.12309
0.11625	0.132398	0.1225	0.109375	0.176341	0.0919906	0.0714869	0.08045
0.083125	0.137665	0.105625	0.104375	0.150822	0.11952	0.0329692	0.0579061
0.064375	0.0932213	0.105	0.0225	0.104911	0.071805	0	0.0702669
0.149375	0.145007	0.1075	0.0625	0.0901744	0.165285	0.220626	0.0621609
0.134375	0.107086	0.073125	0.12	0.0499058	0.0783319	0.0954062	0.0877781
0.16875	0.145256	0.074375	0.140625	0.0489217	0.128949	0.0856762	0.0867056
0.141875	0.100544	0.09625	0.198125	0.097245	0.187161	0.108118	0.121713
0.209375	0.102901	0.150625	0.125625	0.0924281	0.0979825	0.0863325	0.104246
0.118125	0.0841062	0.075	0.086875	0.0642206	0.106064	0.160203	0.123428
0.185	0.125061	0.1125	0.178125	0.104199	0.166128	0.09876	0.0757075
0.115625	0.13193	0.07125	0.10875	0.107759	0.117531	0.066415	0.113964
0.15125	0.103471	0.101875	0.10125	0.115722	0.120631	0.0563854	0.098835
0.088125	0.0726894	0.05875	0.110625	0	0.156834	0.102289	0.0626587
0.164375	0.09367	0.053125	0	0	0.127634	0.0415881	0.0472975
0.091875	0.106023	0.06375	0.225	0.154663	0.199257	0.0670469	0.074715
0.104375	0.13209	0.081875	0.076875	0.0893512	0.198207	0.0472221	0.118146
0.100625	0.0975194		0.139375	0.0872481	0.179386	0	0.101112
0.12	0.121797		0.040625	0.220264	0.109756	0.101929	0.0858956
0.094375	0.0915919		0.055625	0.0695013	0.167763	0.0452118	0.0693169
0.11875	0.122497		0.2	0	0.161537	0.0819987	0.0740606
0.0875	0.123039		0.184375	0.0826506	0.157521	0.049384	0.0453961
0.031875	0.122659		0.1375	0.0832912	0.105069	0.0503941	0.18257
0.101875	0.154594		0.125625		0.180779	0.0952819	0.09076
0.095625	0.135612		0.23375		0.162341	0.0288303	0.0630575
0.120625	0.121225		0.1225		0.172245		0.0656469
0.060625	0.16153		0.088125		0.218974		0.0491974
	0.0625963		0.15625		0.100587		0.0507136
	0.09047		0.098125		0.117517		0.0563915
	0.0915406		0.07875		0.0824431		0.0738406
	0.101945		0.031875		0.0378853		0.108024
	0.0686369		0.026875		0.17412		0.0960475
	0.0973637		0.11		0.101211		0.0987688
	0.0917319		0.12		0.169239		0.100973
	0.0659006		0.11375		0.0973206		0.0775187
	0.106596		0.098125		0.114468		0.0982325
	0.0667825		0.08625		0.119322		0
	0.0942662		0.08625		0.16998
	0.0542155		0.033125		0.0835319
	0.0946525		0.090625		0.107148
	0.0634381		0.09625		0.0918419
	0.072745		0.17		0.0758006
	0.100834		0.108125		0.0872425
	0.125089		0.149375		0.149321
	0.173558		0.068125		0.0680925
			0.100625		0.100857
			0.063125		0.0634244

## Sheet: Fig.5F-right
max velocity
Wild type	MPS3-DDD	cdc28-as1	cdc28-as1 MPS3-DDD	cdc7-as3	cdc7-as3 MPS3-DDD	cdc7 bob1-1	cdc7 bob1-1 MPS3-DDD
0.185171	0.240906	0.311207	0.349249	0.160317	0.289439	0	0.156651
0.413108	0.276123	0.154931	0.24955	0.267092	0.292408	0.101173	0.105485
0.128482	0.302684	0.273876	0.305596	0.237209	0.171781	0.153011	0.102322
0.417805	0.375867	0.392418	0.317727	0.176972	0.173038	0.159286	0.305859
0.231397	0.203403	0.239815	0.0482659	0.24888	0.221607	0.0885706	0.218011
0.179059	0.376406	0.188515	0.213047	0.31947	0.220312	0.162035	0.209659
0.156337	0.227086	0.218869	0.228524	0.270032	0.25225	0.0329692	0.08892
0.108361	0.286263	0.248469	0.0442587	0.181903	0.129058	0	0.123829
0.410271	0.334441	0.239434	0.147139	0.316379	0.194715	0.349896	0.113713
0.225106	0.139258	0.0799669	0.396737	0.0499058	0.242126	0.247587	0.197817
0.312277	0.252534	0.155031	0.279854	0.0489217	0.251087	0.128491	0.151132
0.245004	0.302584	0.233593	0.415451	0.147262	0.222689	0.16889	0.202736
0.450192	0.151072	0.514112	0.395626	0.227428	0.129426	0.132671	0.166998
0.395741	0.14414	0.122249	0.192881	0.0758369	0.21201	0.269636	0.204116
0.307848	0.316108	0.227937	0.373093	0.190101	0.409388	0.148498	0.23786
0.126707	0.280288	0.104353	0.381954	0.221025	0.223527	0.128627	0.172674
0.359709	0.199606	0.156918	0.227529	0.175142	0.209077	0.104396	0.172201
0.19878	0.220969	0.0855269	0.305079	0	0.413241	0.169544	0.123313
0.297136	0.183647	0.131216	0	0	0.256881	0.0748687	0.0852938
0.211884	0.234198	0.134951	0.363052	0.351613	0.356374	0.143673	0.206971
0.246499	0.154778	0.0985437	0.198226	0.0962431	0.455874	0.0941238	0.293544
0.233528	0.259954		0.246084	0.235368	0.333034	0	0.172034
0.282018	0.280215		0.0782925	0.484246	0.200259	0.122714	0.158469
0.209466	0.163716		0.129913	0.252517	0.2434	0.105667	0.0870831
0.222693	0.225454		0.307761	0	0.192586	0.136766	0.140671
0.155322	0.167807		0.250541	0.14337	0.327464	0.0561712	0.0757738
0.0574448	0.247335		0.290366	0.210037	0.120593	0.076825	0.339669
0.233719	0.245437		0.295774		0.337162	0.174492	0.137908
0.201477	0.194709		0.330084		0.334802	0.0392183	0.12763
0.147412	0.22107		0.236564		0.382709		0.1452
0.0995356	0.233301		0.119342		0.376762		0.123544
	0.0807575		0.360682		0.157924		0.112091
	0.238088		0.166582		0.182143		0.108137
	0.234262		0.0973381		0.118521		0.209654
	0.197373		0.0829769		0.0398436		0.216464
	0.125851		0.0567219		0.354737		0.214412
			0.204204		0.180491		0.201019
			0.161209		0.363481		0.262467
			0.254241		0.169124		0.118589
			0.160851		0.156262		0.186738
			0.115627		0.319239
			0.152348		0.389418
			0.082285		0.144984
			0.212411		0.18495
			0.190086		0.168689
			0.318433		0.105846
			0.177436		0.172176
			0.319561
			0.07826
			0.269689
			0.0941994
