# Supplementary material for: Phosphorylation of luminal region of the SUN-domain protein Mps3 promotes nuclear envelope localization during meiosis
Source: eLife. 2021 Sep 29;10:e63119. doi: 10.7554/eLife.63119 (PMC8570693; doi:10.7554/eLife.63119)
Supplement: Figure 6—source data 1. [file elife-63119-fig6-data1.xlsx]

## Sheet: Fig.6C
WT Mps3-GFP	average						SD
Time (h)	Class I	Class II	Class III	Class IV			Class I	Class II	Class III	Class IV
0	100	0	0	0			0	0	0	0
1	98	2	0	0			2	2	0	0
2	65.6667	33.6667	0.666667	0			6.65833	7.76745	1.1547	0
3	14	38.6667	47.3333	0			3.4641	4.6188	7.02377	0
4	1	13.6667	58.3333	27			1.73205	3.51188	4.93288	6.245
5	0	9	36.6667	54.3333			0	3.60555	5.7735	4.04145
6	0	5.66667	21	73.3333			0	0.57735	3.60555	3.05505
7	0	0	15	85			0	0	3	3
8	0	0	6.66667	93.3333			0	0	3.05505	3.05505
MPS3-S189A	average						SD
	Class I	Class II	Class III	Class IV			Class I	Class II	Class III	Class IV
0	100	0	0	0			0	0	0	0
1	100	0	0	0			0	0	0	0
2	100	0	0	0			0	0	0	0
3	100	0	0	0			0	0	0	0
4	64	33	3	0			2.82843	1.41421	1.41421	0
5	31.5	25.5	43	0			2.12132	0.707107	2.82843	0
6	22.5	30.5	47	0			3.53553	4.94975	1.41421	0
7	16	31	53	0			5.65685	7.07107	1.41421	0
8	0	16.5	68	15.5			0	4.94975	2.82843	2.12132
9	0	8.5	66	25.5			0	0.707107	2.82843	2.12132
MPS3-S190A	average						SD
	Class I	Class II	Class III	Class IV			Class I	Class II	Class III	Class IV
0	100	0	0	0			0	0	0	0
1	100	0	0	0			0	0	0	0
2	100	0	0	0			0	0	0	0
3	92.3333	7.66667	0	0			3.78594	3.78594	0	0
4	72	22.3333	5.66667	0			2	2.51661	0.57735	0
5	39.6667	48.3333	12	0			2.51661	4.04145	3.4641	0
6	9.66667	24.6667	59	6.66667			3.51188	2.3094	1.73205	2.3094
7	1.33333	15.3333	69.3333	14			2.3094	4.16333	4.16333	2
8	0	8.66667	75	16.6667			0	3.05505	3	1.1547
9	0	2	75.3333	22.6667			0	2	3.05505	2.3094

## Sheet: Fig.6D
	Average %					SD
	Class I	Class II	Class III	Class IV		Class I	Class II	Class III	Class IV
Wild type	0	5.66667	21	73.3333		5.66667	0.57735	3.60555	3.05505
mps3-S189A	22.5	30.5	47	0		30.5	4.94975	1.41421	0
mps3-S190A	9.66667	24.6667	59	6.66667		24.6667	2.3094	1.73205	2.3094

## Sheet: Fig.6F
average				max
Wild type	mps3-S189A	mps3-S190A		Wild type	mps3-S189A	mps3-S190A
0.14	0.06	0.13		0.26	0.14	0.21
0.2	0.04	0.15		0.36	0.07	0.33
0.18	0.03	0.13		0.5	0.09	0.3
0.21	0.07	0.09		0.34	0.1	0.17
0.19	0.12	0.09		0.19	0.28	0.23
0.14	0.02	0.08		0.32	0.02	0.12
0.19	0.11	0.11		0.35	0.17	0.14
0.12	0.07	0.08		0.25	0.15	0.19
0.27	0.06	0.17		0.77	0.11	0.4
0.1	0.04	0.07		0.1	0.07	0.1
0.21	0.07	0.08		0.47	0.16	0.14
0.13	0.12	0.06		0.23	0.18	0.07
0.2	0.07	0.09		0.36	0.18	0.21
0.19	0.08	0.08		0.36	0.17	0.15
0.24	0.09	0.09		0.38	0.15	0.33
	0.07	0.08			0.13	0.13
	0.08	0.09			0.17	0.25
	0.08	0.09			0.14	0.16
	0.07	0.09			0.12	0.27
	0.07	0.08			0.12	0.18
	0.07	0.08			0.15	0.14
	0.05	0.02			0.08	0.04
	0.08	0.15			0.22	0.25
	0.05	0.09			0.07	0.23
	0.09	0.12			0.21	0.36
	0.05	0.08			0.1	0.14
	0.07	0.05			0.11	0.11
	0.11	0.1			0.2	0.22
	0.04	0.15			0.06	0.3
	0.06	0.12			0.08	0.25
	0.07	0.03			0.13	0.03
	0.06	0.13			0.08	0.43
	0.12	0.08			0.3	0.18
	0.1	0.09			0.19	0.22
		0				0
		0.1				0.28
		0.13				0.39
		0.08				0.11
		0.12				0.29

## Sheet: Fig.6G
Wild type		mps3-S189A		mps3-S190A
0 h	4 h	0 h	4 h	0 h	4 h
0.15	2.46	0.12	0.84	0.05	0.64
0.24	2.59	0.18	0.89	0.14	0.87
0.34	2.71	0.22	1.14	0.22	0.93
0.37	3.27	0.34	1.35	0.24	1.05
0.42	3.48	0.35	1.63	0.27	1.45
0.42	3.63	0.42	1.64	0.33	1.53
0.43	3.65	0.43	1.68	0.35	1.76
0.43	3.91	0.44	1.7	0.37	1.86
0.45	3.93	0.44	1.75	0.47	1.89
0.46	4.03	0.47	1.78	0.48	1.95
0.54	4.2	0.52	1.84	0.56	2.31
0.7	4.21	0.63	1.87	0.58	2.36
0.7	4.33	0.64	1.88	0.87	2.43
0.84	5.03	0.66	1.89	0.88	2.56
0.88	5.07	0.84	1.9	1	2.65
0.89	5.07	0.87	1.94	1.03	2.66
1.02	5.18	0.88	1.95	1.04	2.74
1.04	5.22	0.89	1.98	1.07	2.78
1.04	5.42	0.9	2	1.09	2.78
1.06	5.63	0.93	2.15	1.14	2.94
1.08	5.66	0.94	2.21	1.15	2.95
1.12	5.69	0.95	2.34	1.16	3.15
1.12	5.72	0.97	2.34	1.18	3.25
1.13	5.81	0.99	2.36	1.22	3.25
1.15	5.82	1.03	2.45	1.24	3.42
1.15	5.89	1.05	2.54	1.25	3.45
1.17	5.94	1.08	2.54	1.26	3.45
1.18	5.96	1.11	2.55	1.26	3.54
1.18	6.36	1.12	2.58	1.32	3.64
1.23	6.36	1.12	2.64	1.34	3.65
1.23	6.37	1.13	2.65	1.34	3.75
1.25	6.41	1.14	2.65	1.36	3.78
1.27	6.45	1.15	2.69	1.39	3.87
1.33	6.56	1.16	2.71	1.42	3.88
1.37	6.57	1.16	2.75	1.43	4.21
1.42	6.57	1.17	2.76	1.43	4.32
1.43	6.63	1.19	2.78	1.45	4.33
1.43	6.64	1.23	2.78	1.45	4.34
1.43	6.69	1.38	2.78	1.48	4.53
1.43	6.69	1.42	2.88	1.49	4.65
1.44	6.69	1.43	2.88	1.55	4.67
1.46	6.71	1.43	2.89	1.57	4.67
1.53	6.78	1.44	2.9	1.57	4.76
1.57	6.79	1.44	2.93	1.58	4.88
1.58	6.83	1.45	3.21	1.69	5.02
1.6	6.85	1.47	3.21	1.76	5.06
1.64	6.85	1.52	3.21	1.77	5.16
1.65	6.85	1.53	3.33	1.78	5.18
1.66	6.88	1.54	3.34	1.79	5.19
1.67	6.92	1.58	3.42	1.79	5.2
1.69	6.98	1.58	3.42	1.79	5.2
1.72	7.13	1.59	3.46	1.79	5.32
1.73	7.14	1.65	3.46	1.79	5.34
1.76	7.43	1.67	3.48	1.82	5.43
1.79	7.44	1.68	3.52	1.84	5.59
1.83	7.52	1.68	3.53	1.84	5.6
1.83	7.54	1.7	3.53	1.85	5.66
1.84	7.58	1.73	3.54	1.87	5.67
1.85	7.66	1.73	3.54	1.88	5.67
1.88	7.69	1.74	3.56	1.88	5.69
1.89	7.73	1.75	3.58	1.89	5.7
1.89	7.84	1.77	3.65	1.89	5.74
1.92	7.87	1.78	3.65	1.89	5.77
1.93	7.89	1.83	3.65	1.89	5.78
1.95	7.92	1.84	3.66	1.89	5.79
2.02	7.92	1.85	3.67	1.9	5.8
2.04	7.97	1.86	3.67	1.9	5.83
2.06	8.02	1.88	3.67	1.9	5.84
2.08	8.1	1.88	3.68	1.93	5.92
2.12	8.26	1.89	3.76	2.05	5.95
2.17	8.27	1.9	3.76	2.05	5.98
2.21	8.3	1.94	3.77	2.07	6
2.22	8.32	1.96	3.87	2.09	6.02
2.23	8.33	1.99	3.88	2.14	6.02
2.24	8.43	2	3.89	2.15	6.05
2.34	8.53	2	3.91	2.18	6.07
2.41	8.62	2.03	3.95	2.21	6.09
2.63	8.63	2.04	3.95	2.25	6.09
2.64	8.7	2.06	3.98	2.32	6.16
2.65	8.73	2.07	4.12	2.43	6.17
2.78	8.74	2.09	4.14	2.43	6.17
2.95	8.88	2.16	4.2	2.45	6.18
2.97	8.9	2.18	4.21	2.53	6.18
3.12	8.91	2.22	4.23	2.54	6.19
3.14	8.91	2.23	4.32	2.54	6.2
3.18	8.95	2.26	4.32	2.54	6.21
3.2	8.97	2.35	4.35	2.78	6.21
3.24	9.08	2.44	4.52	2.88	6.21
3.25	9.12	2.47	4.52	2.89	6.25
3.27	9.19	2.53	4.52	2.95	6.27
3.28	9.32	2.53	4.53	2.98	6.29
3.33	9.34	2.54	4.76	3.16	6.3
3.34	9.37	2.54	4.76	3.42	6.31
3.41	9.42	2.55	5.21	3.54	6.32
3.43	9.43	2.66	5.32	3.65	6.35
3.65	9.43	2.68	5.42	3.74	6.36
3.83	9.57	2.69	5.43	3.77	6.37
3.87	9.68	3.21	5.77	3.78	6.37
3.91	9.73	3.27	5.87	3.94	6.37
4.1	9.81	3.45	5.99	4.3	6.75
