# Supplementary figures and images for: Phosphorylation of luminal region of the SUN-domain protein Mps3 promotes nuclear envelope localization during meiosis
Source: eLife journal article supplement (doi:10.7554/elife.63119), 2021-09-29

Figure 3G Rao et. al.

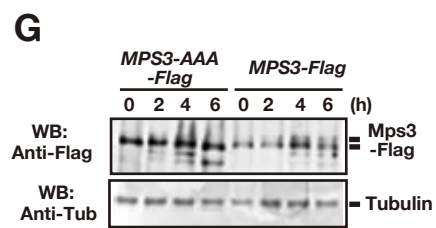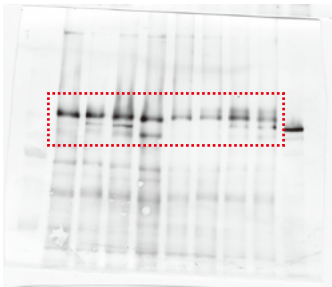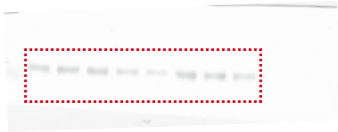

Supplement: supp [file elife-63119-supp-v1.zip]

Figure 3C Rao et. al.

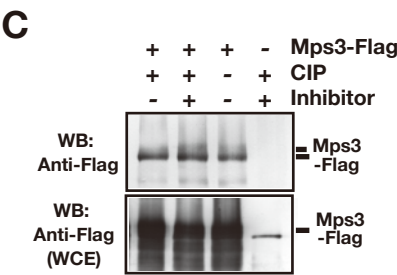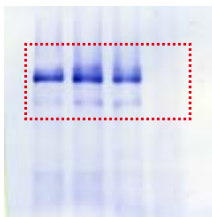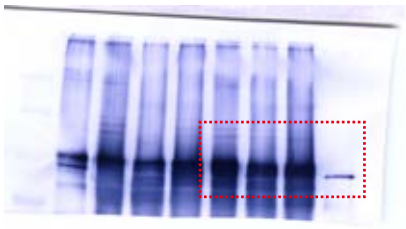

Supplement: supp [file elife-63119-supp-v1.zip]

Figure 3H Rao et. al.

H

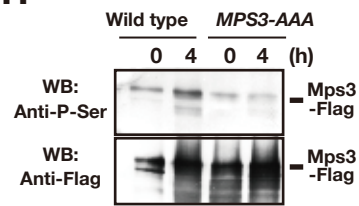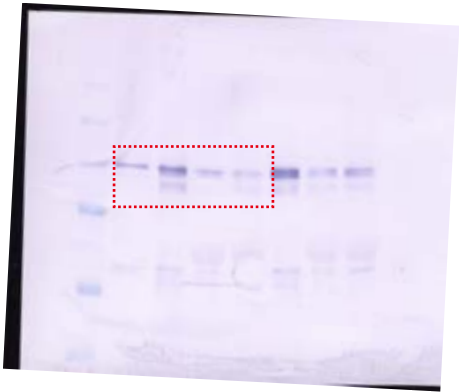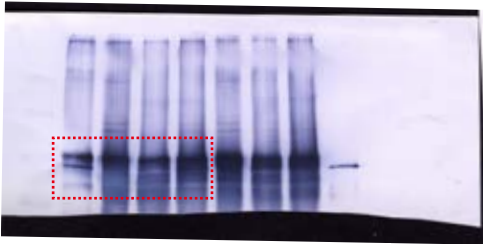

Supplement: supp [file elife-63119-supp-v1.zip]

Figure 3D Rao et. al.

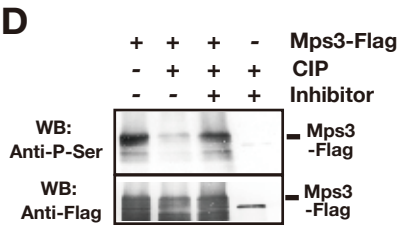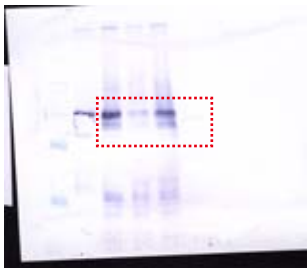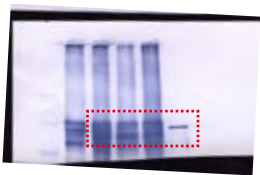

Supplement: supp [file elife-63119-supp-v1.zip]

Figure 3C Rao et. al.

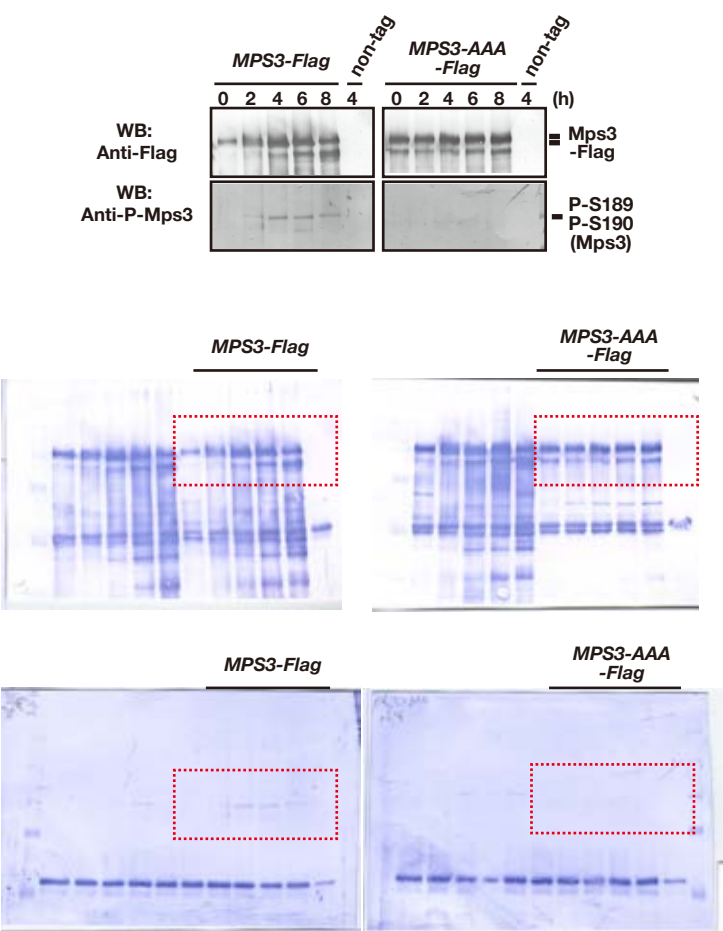

Supplement: supp [file elife-63119-supp-v1.zip]

Figure 3I Rao et. al.

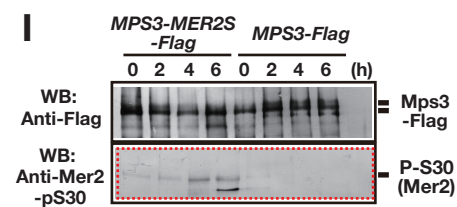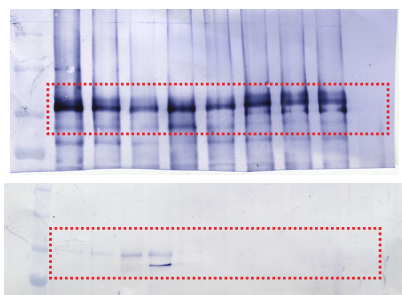

Supplement: supp [file elife-63119-supp-v1.zip]
